# Supplementary material
Source: PubMed Central journal article supplement (PMC8168016)
Supplement: NIHMS1639716-supplement-1.pdf [file NIHMS1639716-supplement-1.pdf]

## Supplemental Information

### A hydrophobic ratchet entrenches molecular complexes

Georg K.A. Hochberg (1), Yang Liu (2), Erik G. Marklund (3), Brian P. H. Metzger (1), Arthur Laganowsky (2), Joseph W. Thornton (1,4)\*

1. Department of Ecology and Evolution, University of Chicago, Chicago USA 60637
2. Department of Chemistry, Texas A&M University, College Station, Texas USA 77843-3255
3. Department of Chemistry – BMC, Uppsala University, Uppsala, Sweden 75123
4. Department of Human Genetics, University of Chicago, Chicago USA 60637

\* Editorial correspondence: Joseph Thornton, [joet1@uchicago.edu](mailto:joet1@uchicago.edu), 1-773-834-3423

**Supplemental Data: 1 Raw gel images.** Uncropped gels for data presented in Extended Data Figure 4b. Boxes are drawn around lanes that were used in for the figure.

**Supplemental Data: 2 Scaled Q matrices based on mutation accumulation experiments.** Row indicates the initial state, column the mutated state. **a**, *M. musculus*. **b**, *S. cerevisiae*. **c**, *E. coli*. **d**, *P. aeruginosa*.

## Supplemental Data 1

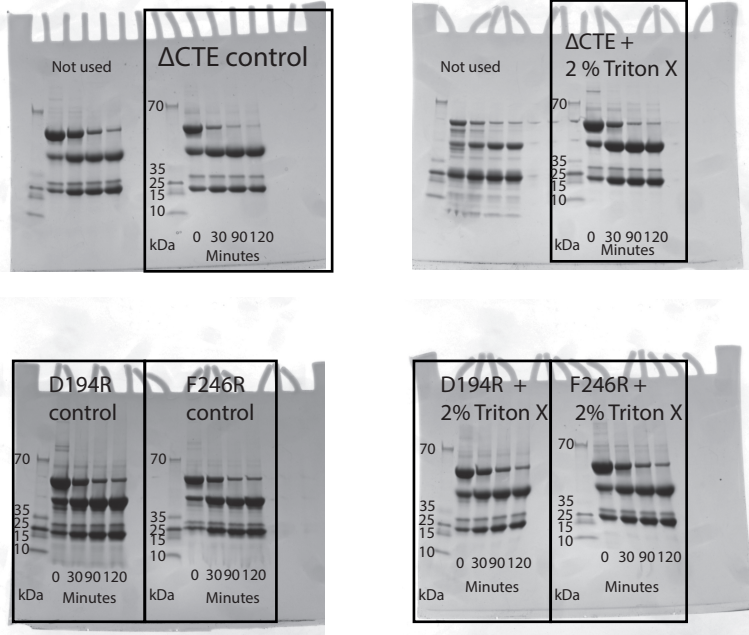

## Supplemental Data 2

**a**

| <i>M.musculus</i> | A          | T          | G           | C           |
|-------------------|------------|------------|-------------|-------------|
| A                 | -0.1435687 | 0.04495586 | 0.07105926  | 0.02755359  |
| T                 | 0.04495586 | -0.1435687 | 0.02755359  | 0.07105926  |
| G                 | 0.24033653 | 0.07128626 | -0.35643129 | 0.04480851  |
| C                 | 0.07128626 | 0.24033653 | 0.04480851  | -0.35643129 |

**b**

| <i>S.cerevisiae</i> | A           | T           | G           | C           |
|---------------------|-------------|-------------|-------------|-------------|
| A                   | -0.15834166 | 0.03146853  | 0.07192807  | 0.05494505  |
| T                   | 0.03146853  | -0.15834166 | 0.05494505  | 0.07192807  |
| G                   | 0.17482517  | 0.09090909  | -0.34165834 | 0.07592408  |
| C                   | 0.09090909  | 0.17482517  | 0.07592408  | -0.34165834 |

**c**

| <i>E.coli</i> | A           | T           | G           | C           |
|---------------|-------------|-------------|-------------|-------------|
| A             | -0.22222222 | 0.03535354  | 0.10606061  | 0.08080808  |
| T             | 0.03535354  | -0.22222222 | 0.08080808  | 0.10606061  |
| G             | 0.17676768  | 0.06565657  | -0.27777778 | 0.03535354  |
| C             | 0.06565657  | 0.17676768  | 0.03535354  | -0.27777778 |

**d**

| <i>P.aeruginosa</i> | A           | T           | G           | C           |
|---------------------|-------------|-------------|-------------|-------------|
| A                   | -0.13613614 | 0.02252252  | 0.06806807  | 0.04554555  |
| T                   | 0.02252252  | -0.13613614 | 0.04554555  | 0.06806807  |
| G                   | 0.26176176  | 0.07957958  | -0.36386386 | 0.02252252  |
| C                   | 0.07957958  | 0.26176176  | 0.02252252  | -0.36386386 |
